# Supplementary material for: The Antioxidant, Anti-Inflammatory, and Neuroprotective Properties of the Synthetic Chalcone Derivative AN07
Source: PubMed Central journal article supplement (PMC7355731; doi:10.3390/molecules25122907), 2020-06-24
Supplement: molecules-25-02907-s001.pdf [file molecules-25-02907-s001.pdf]

## Supplementary Figure S1

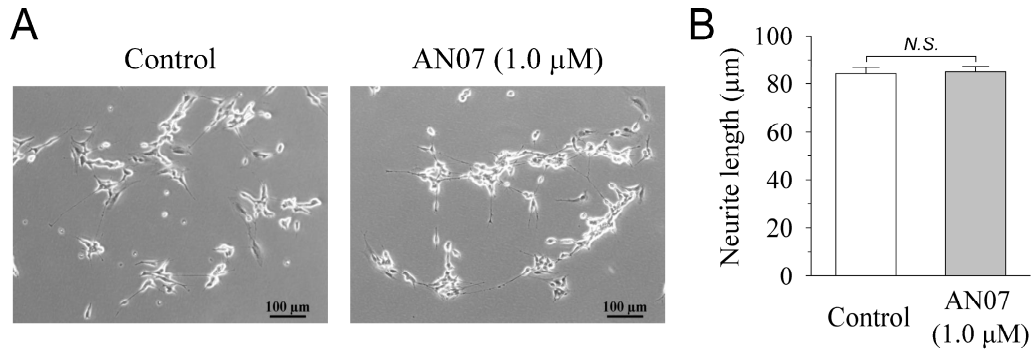

**Supplementary Figure S1.** AN07 itself does not affect the neurite outgrowth of SH-SY5Y cells. Cells were incubated with retinoic acid (10  $\mu\text{M}$ ) for five days to induce differentiation. Differentiated SH-SY5Y cells were treated with AN07 (1.0  $\mu\text{M}$ ) for another day. **(A)** Representative phase-contrast images showing the neurite outgrowth of SH-SY5Y cells. **(B)** Quantitative analyses of the neurite length using the ImageJ software. Scale bar, 100  $\mu\text{m}$ . Columns, mean  $\pm$  S.E.M. from at least 30 cells of three independent experiments. N.S. no significance.
